# Supplementary material
Source: publisher site journal article supplement (https://www.dovepress.com/article/573344)
Supplement: Supplementary file 1 [file 573344%20Supplementary%20Table_1.docx]

supplementary Table 1 qPCR Positive Result

| Pathogen No. | Sample | Ct valuea | Pathogen No. | Sample | Ct value | Pathogen No. | Sample | Ct value |
| --- | --- | --- | --- | --- | --- | --- | --- | --- |
| 91499975 | Sputum | 34.22 | 91555585 | Sputum | 35.64 | 91582649 | Sputum | 35.52 |
| 90955049 | Sputum | 32.73 | 13652774 | Sputum | 32.80 | 91386407 | Sputum | 33.06 |
| 20091636 | Sputum | 34.64 | 91266857 | BALF | 34.96 | 91632682 | Sputum | 34.57 |
| 13384281 | Sputum | 32.23 | 91555148 | BALF | 33.16 | 91057413 | Sputum | 29.57 |
| 91091502 | BALFb | 34.75 | 91571458 | Sputum | 33.09 | 91544988 | Sputum | 31.85 |
| 11564707 | Sputum | 34.69 | 91485813 | Sputum | 32.53 | 91670568 | Sputum | 32.06 |
| 91514287 | Sputum | 33.37 | 91525183 | BALF | 35.88 | 91315787 | Sputum | 28.50 |
| 91385736 | Sputum | 32.34 | 90588504 | Sputum | 35.07 | 13371625 | Sputum | 34.67 |
| 11751284 | Sputum | 34.66 | 90803936 | Sputum | 34.11 | 91707235 | Sputum | 33.14 |
| 91518162 | Sputum | 29.17 | 91543029 | Sputum | 33.44 | 91482324 | Sputum | 32.99 |
| 91467480 | Sputum | 34.90 | 12404194 | Sputum | 34.64 | 13470666 | Sputum | 33.65 |
| 91103045 | Sputum | 32.18 | 91434437 | Sputum | 28.25 | 91640598 | Sputum | 33.63 |
| 91483561 | BALF | 29.11 | 20111363 | Sputum | 29.77 | 90713316 | Sputum | 33.43 |

Notes: a Ct value is the number of cycles required for the fluorescent signal to cross the threshold, b bronchoalveolar lavage fluid.
